# Supplementary material for: FreeD-Enabled Robotic Gait Training Enhances Recovery in Incomplete SCI With Poor Ambulatory Capacity: A Randomized Controlled Trial
Source: Research Square preprint supplement (doi:10.21203/rs.3.rs-6542938/v1), 2025-05-09

**Supplemental Table 1. Outcomes in participants with high baseline AMI scores: Intra- and inter-group analysis.**

|  | **Group** | **T0** | **T1** | **P-value**  **(intra-group)** | **Δ** | **P-value**  **(inter-group)** | **Post-hoc analysis** | | |
| --- | --- | --- | --- | --- | --- | --- | --- | --- | --- |
| **Control**  **vs wo-FDM** | **Control**  **vs w-FDM** | **wo-FDM**  **vs w-FDM** |
| **LEMS** | Control (n=5) | 30.0 [30.0-30.0] | 35.0 [34.0-37.0] | 0.100 | 4.0 [1.0-5.0] | 0.079 |  |  |  |
| wo-FDM (n=3) | 30.0 [30.0-32.0] | 36.0 [36.0-38.0] | 0.149 | 6.0 [6.0-6.0] |
| w-FDM (n=3) | 40.0 [33.5-40.0] | 40.0 [35.0-40.0] | 1.000 | 0.0 [0.0-1.5] |
| **AMI** | Control | 20.0 [17.0-20.0] | 22.0 [18.0-23.0] | 0.416 | 1.0 [1.0-2.0] | 0.275 |  |  |  |
| wo-FDM | 20.0 [18.5-22.0] | 24.0 [22.5-26.0] | 0.149 | 4.0 [4.0-4.0] |
| w-FDM | 28.0 [22.0-28.5] | 29.0 [24.5-29.5] | 0.174 | 1.0 [1.0-2.5] |
| **Proprioception** | Control | 6.0 [6.0-12.0] | 12.0 [6.0-12.0] | 1.000 | 0.0 [0.0-0.0] | 0.286 |  |  |  |
| wo-FDM | 6.0 [6.0-9.0] | 11.0 [10.5-11.5] | 0.371 | 4.0 [2.0-4.5] |
| w-FDM | 12.0 [9.0-12.0] | 12.0 [9.0-12.0] | N/A | 0.0 [0.0-0.0] |
| **BBS** | Control | 4.0 [4.0-4.0] | 13.0 [9.0-15.0] | 0.058 | 5.0 [4.0-13.0] | 0.776 |  |  |  |
| wo-FDM | 7.0 [5.0-22.0] | 26.0 [17.5-41.0] | 0.250 | 19.0 [10.5-21.0] |
| w-FDM | 4.0 [4.0-8.0] | 25.0 [15.0-32.5] | 0.250 | 13.0 [7.0-24.5] |
| **WISCI-II** | Control | 1.0 [0.0-2.0] | 2.0 [1.0-4.0] | 0.371 | 0.0 [0.0-1.0] | 0.069 |  |  |  |
| wo-FDM | 0.0 [0.0-3.0] | 6.0 [4.0-13.0] | 0.250 | 6.0 [4.0-10.0] |
| w-FDM | 0.0 [0.0-0.5] | 8.0 [4.5-13.0] | 0.250 | 8.0 [4.5-12.5] |
| **SCIM-III** | Control | 16.0 [12.0-25.0] | 27.0 [25.0-33.0] | 0.136 | 8.0 [1.0-11.0] | 0.039* | 0.035* | 0.287 | 1.000 |
| wo-FDM | 33.0 [22.0-45.5] | 66.0 [49.5-76.0] | 0.250 | 28.0 [25.0-30.5] |
| w-FDM | 15.0 [13.5-31.0] | 34.0 [25.0-46.0] | 0.250 | 11.0 [7.5-15.0] |
| **SCIM-III**  **(mobility)** | Control | 0.0 [0.0-2.0] | 5.0 [4.0-6.0] | 0.201 | 3.0 [0.0-4.0] | 0.033* | 0.027* | 0.369 | 1.000 |
| wo-FDM | 0.0 [0.0-7.5] | 15.0 [14.0-21.0] | 0.250 | 13.0 [12.5-14.0] |
| w-FDM | 1.0 [0.5-3.0] | 11.0 [6.5-11.5] | 0.250 | 6.0 [4.0-8.5] |

* indicates statistically significant differences in intra-group analysis (p < 0.05).

Since there is no established cutoff value for whether AMI score is low or high, we referred to previous literature and set the criterion based on the average AMI value of 52% for ambulatory SCI individuals. Therefore, we established the criterion as 52% of the total 30, which equals 15.6.

Abbreviations: FDM, FreeD module; NLI, neurological level of injury; AIS, American Spinal Injury Association Impairment Scale; LEMS, Lower Extremity Motor Score; AMI, Ambulatory Motor Index; BBS, Berg Balance Scale; WISCI-II, Walking Index for Spinal Cord Injury II; SCIM-III, Spinal Cord Independence Measure III.

**Supplemental Figure 1. Changes in motor, sensory and functional outcomes with high baseline AMI scores.** This figure shows subgroup analysis results for participants with AMI scores above 15.6 at baseline, across (A) LEMS, (B) AMI, (C) proprioception, (D) BBS, (E) WISCI-II, (F) SCIM-III, and (G) SCIM-III mobility subscale. † indicates significant between-group difference (p < 0.05).


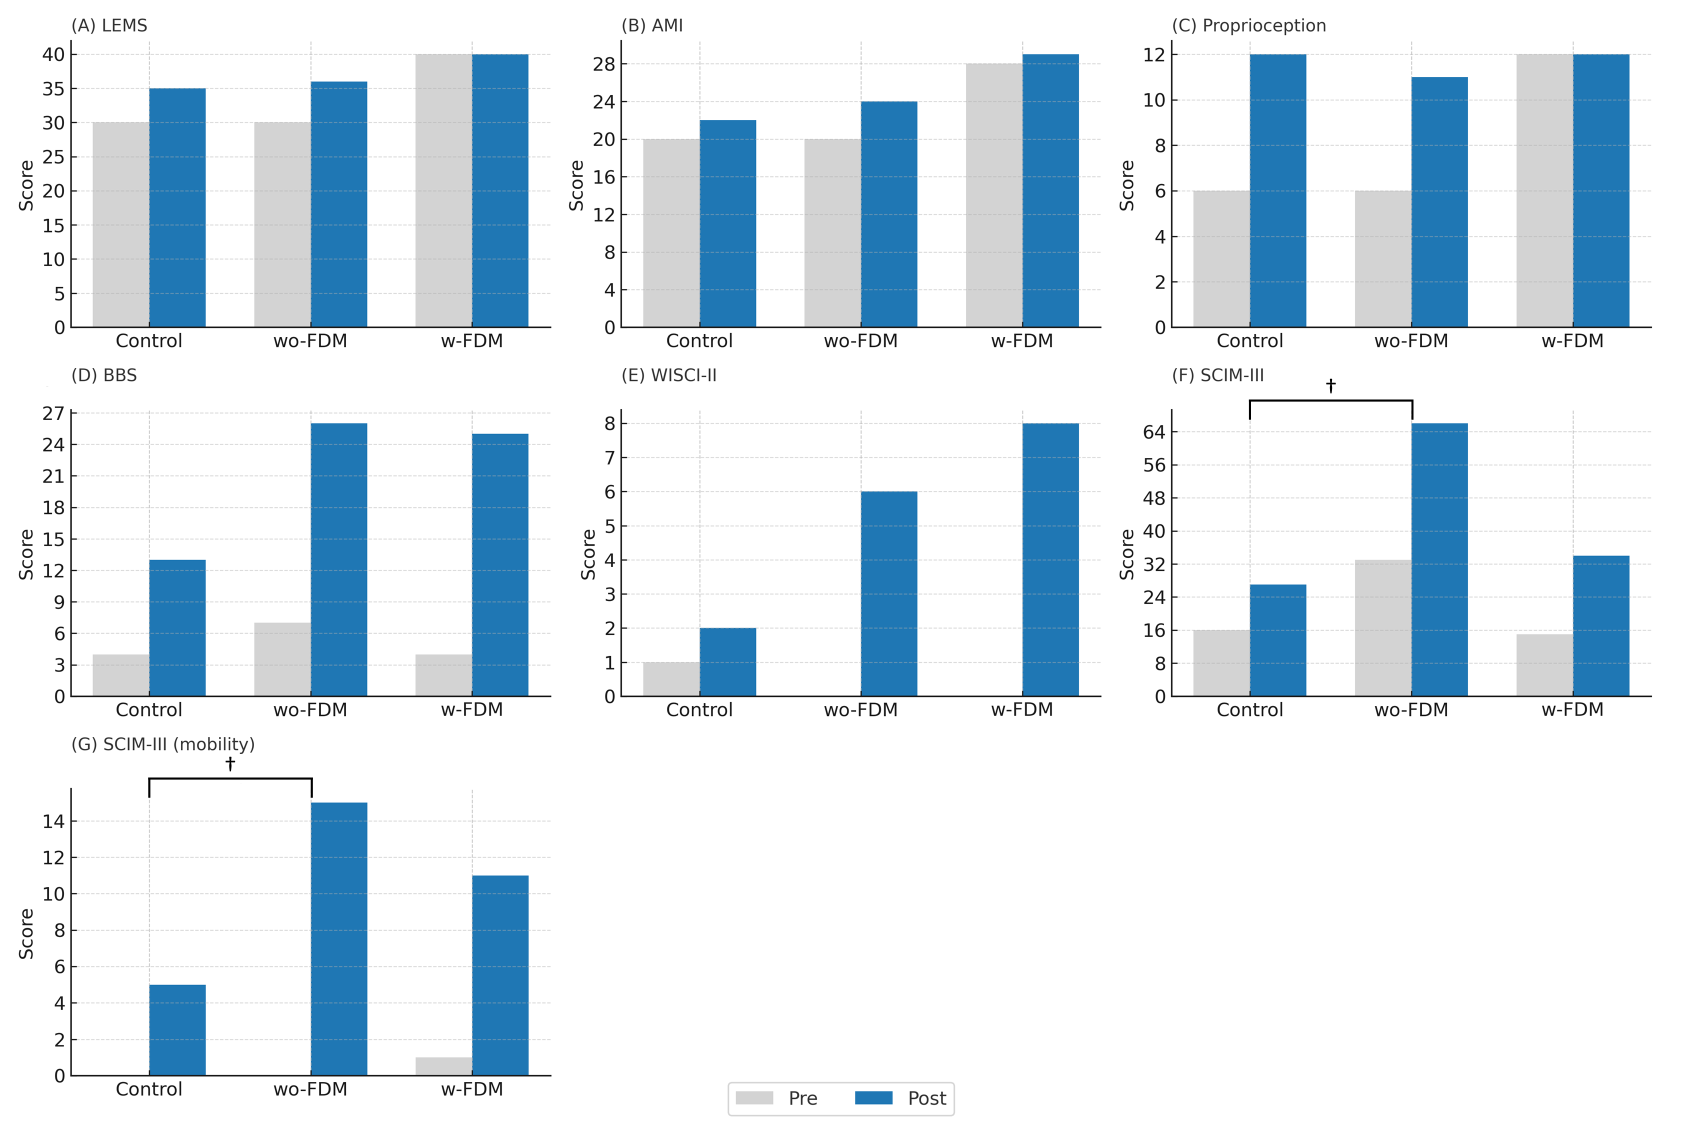

Supplement: Supplementary file 1 [file bc86c1803dedc44faba93ef1.docx]
